# Supplementary material for: First synthesis of meso-substituted pyrrolo[1,2-a]quinoxalinoporphyrins
Source: publisher site journal article supplement (doi:10.3762/bjoc.10.76), 2014-04-08
Supplement: Additional file 2 [file 1860-5397-10-76-S2.pdf]

## Supporting Information File 2

for

# First synthesis of *meso*-substituted pyrrolo[1,2-*a*]quinoxalinoporphyrins

Dileep Kumar Singh and Mahendra Nath\*

Address: Department of Chemistry, University of Delhi, Delhi 110 007, India

Email: Mahendra Nath\* - mnath@chemistry.du.ac.in

\*Corresponding author

**$^1\text{H}$  and  $^{13}\text{C}$  NMR spectra of newly synthesized compounds**

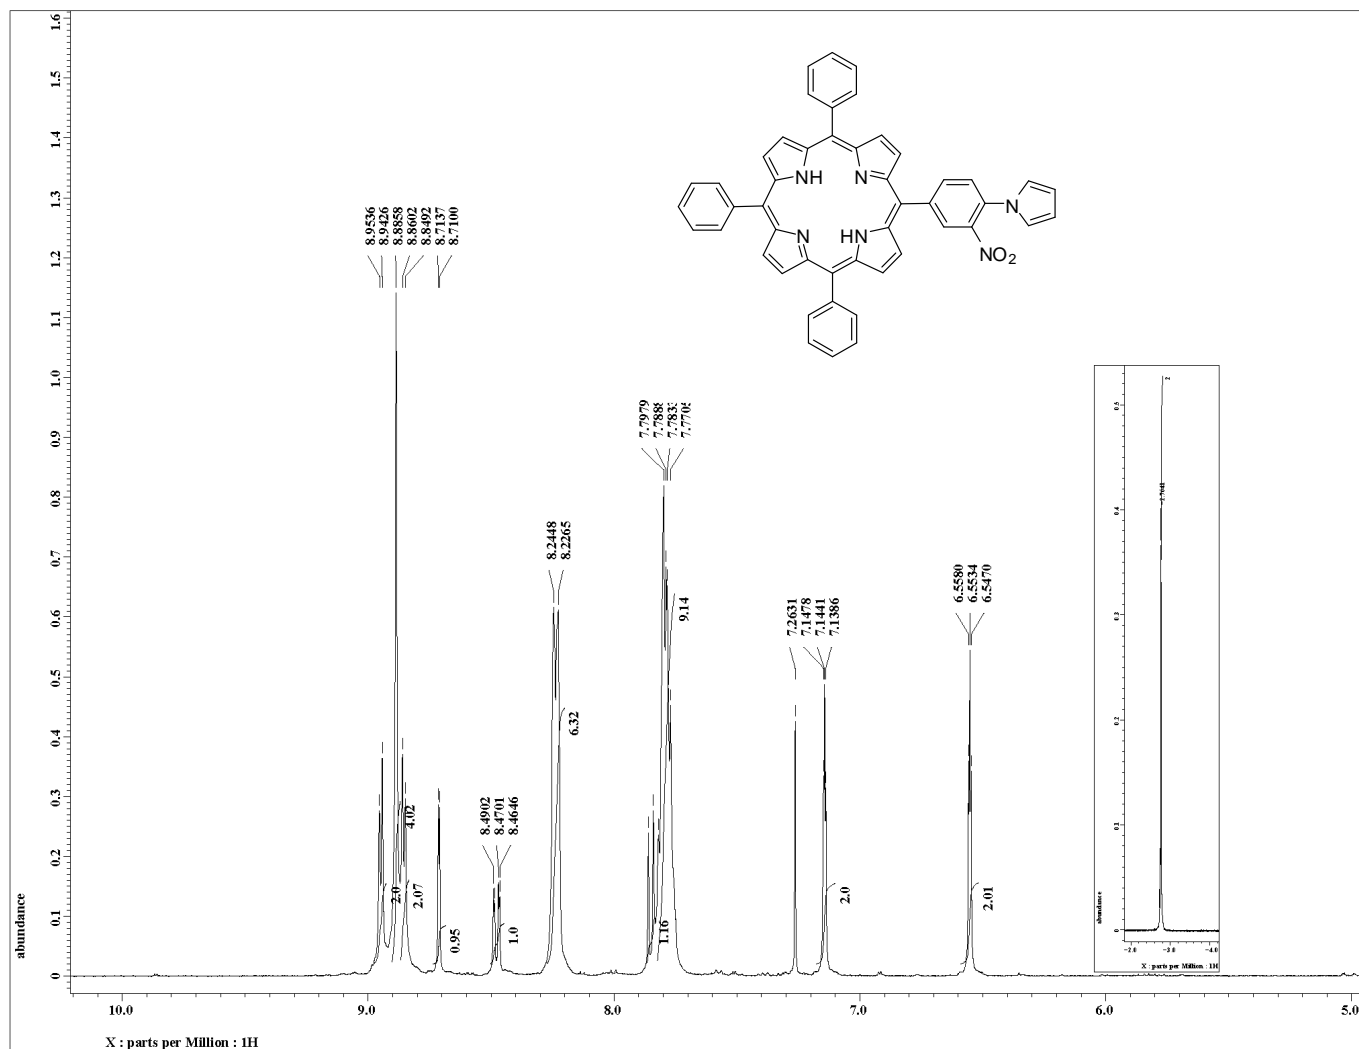

**Figure 1:**  $^1\text{H}$  NMR spectrum of compound 2.



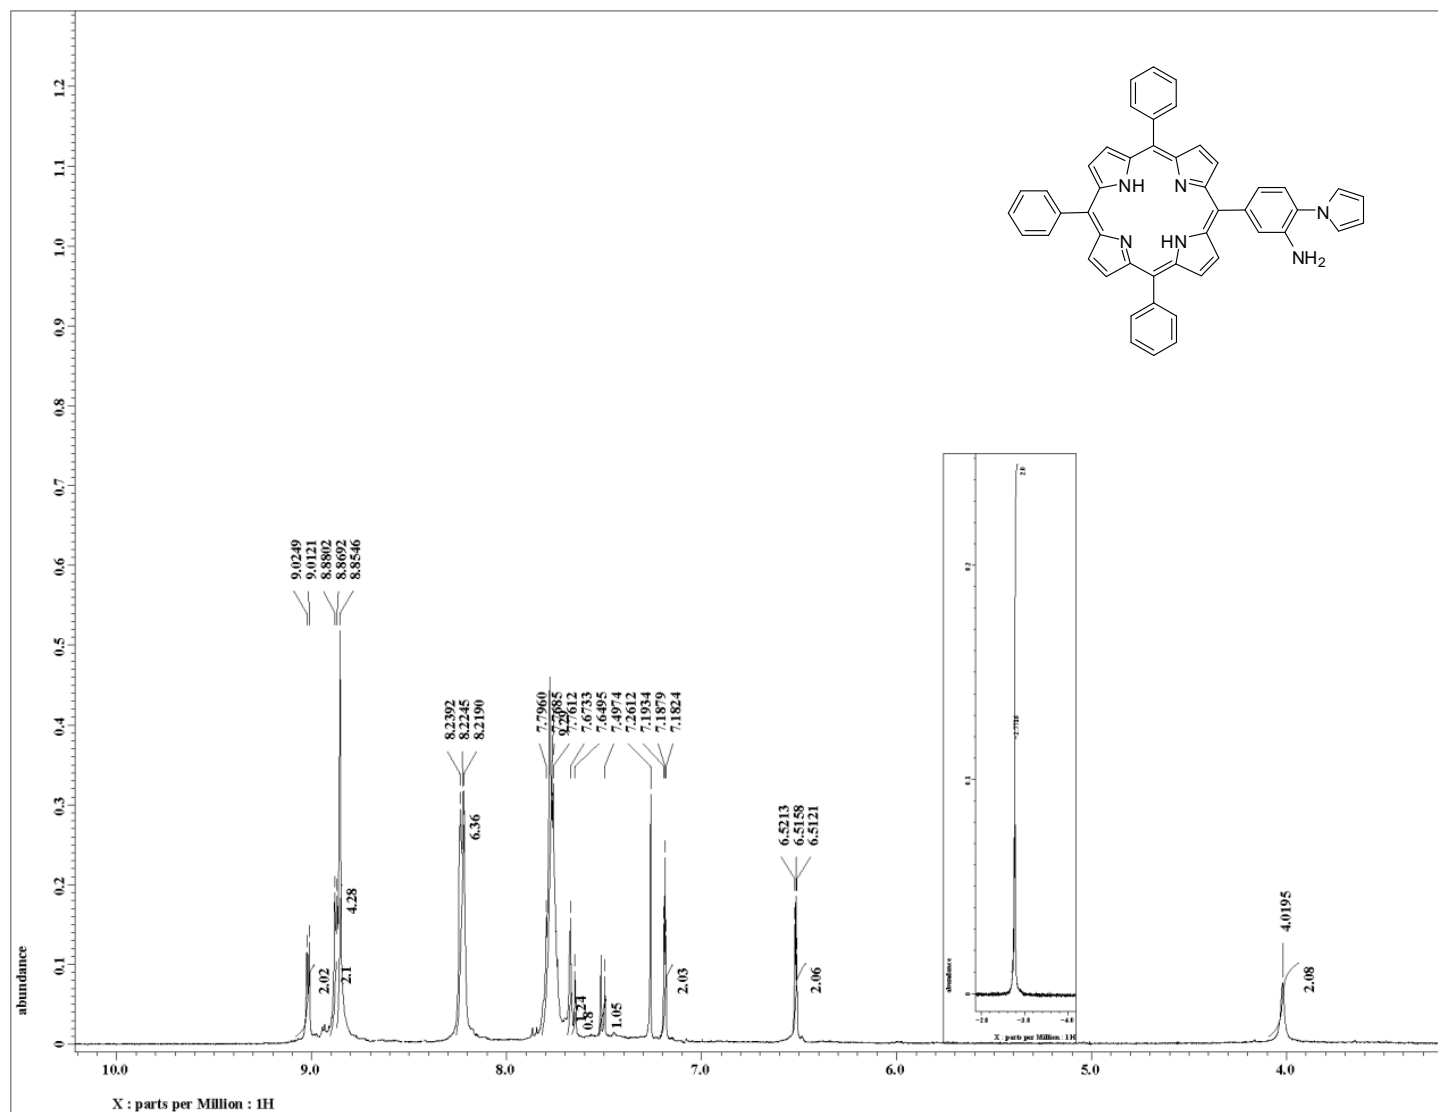

**Figure 3:**  $^1\text{H}$  NMR spectrum of compound 3.

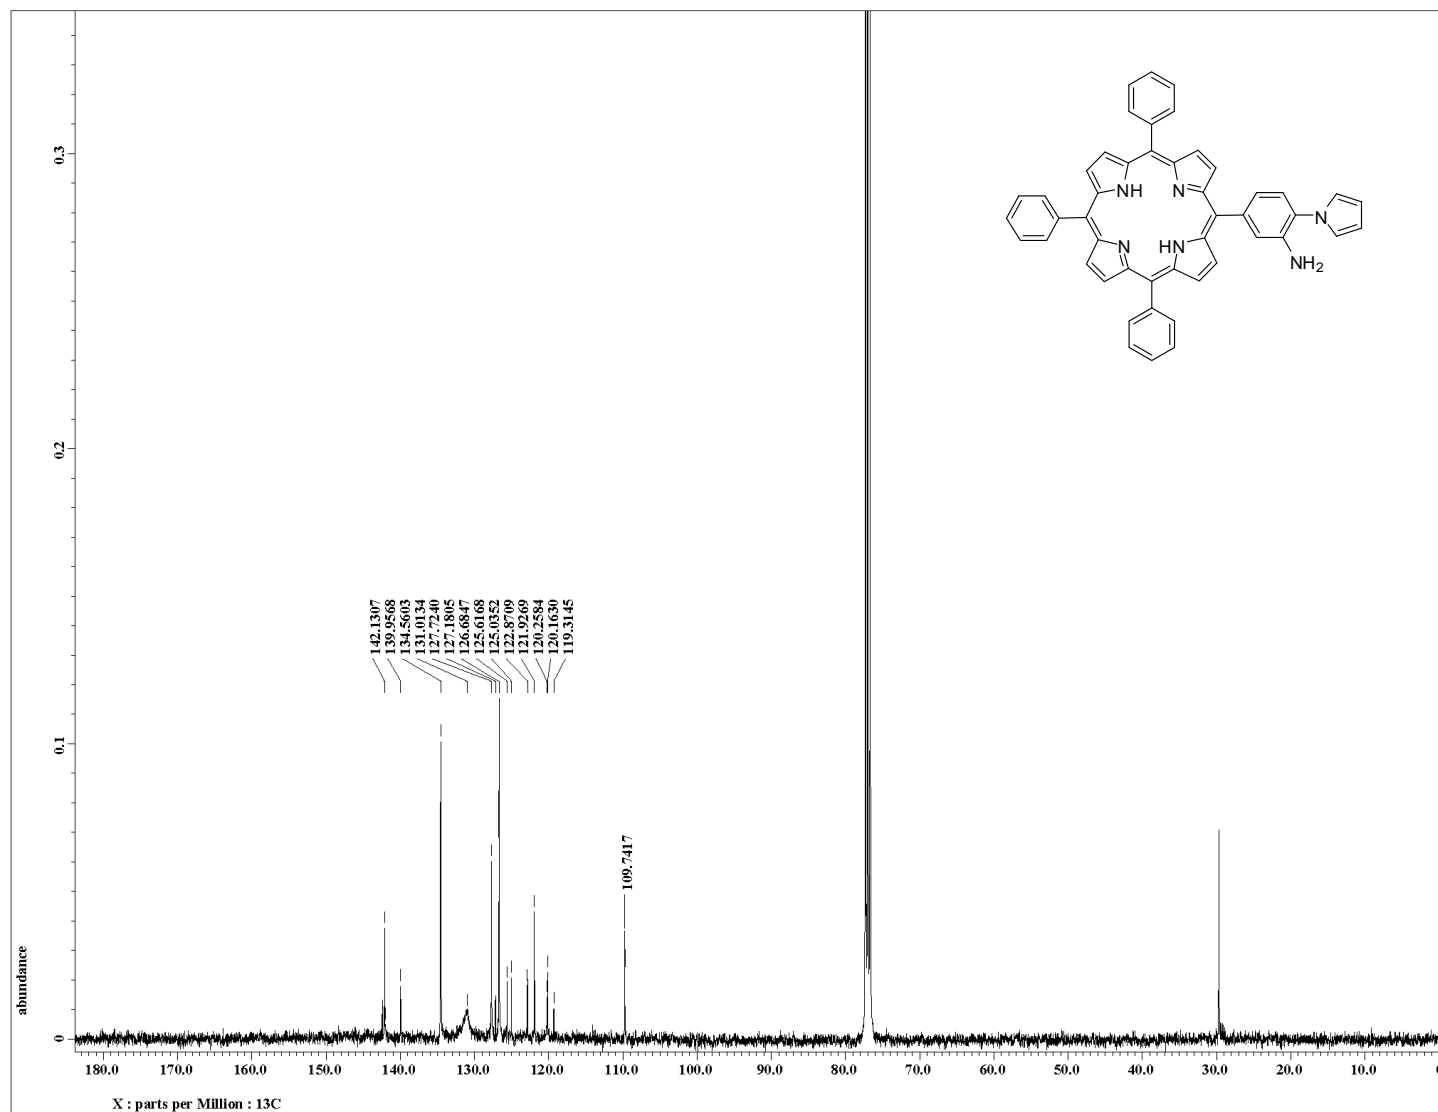

Figure 4:  $^{13}\text{C}$  NMR spectrum of compound 3.

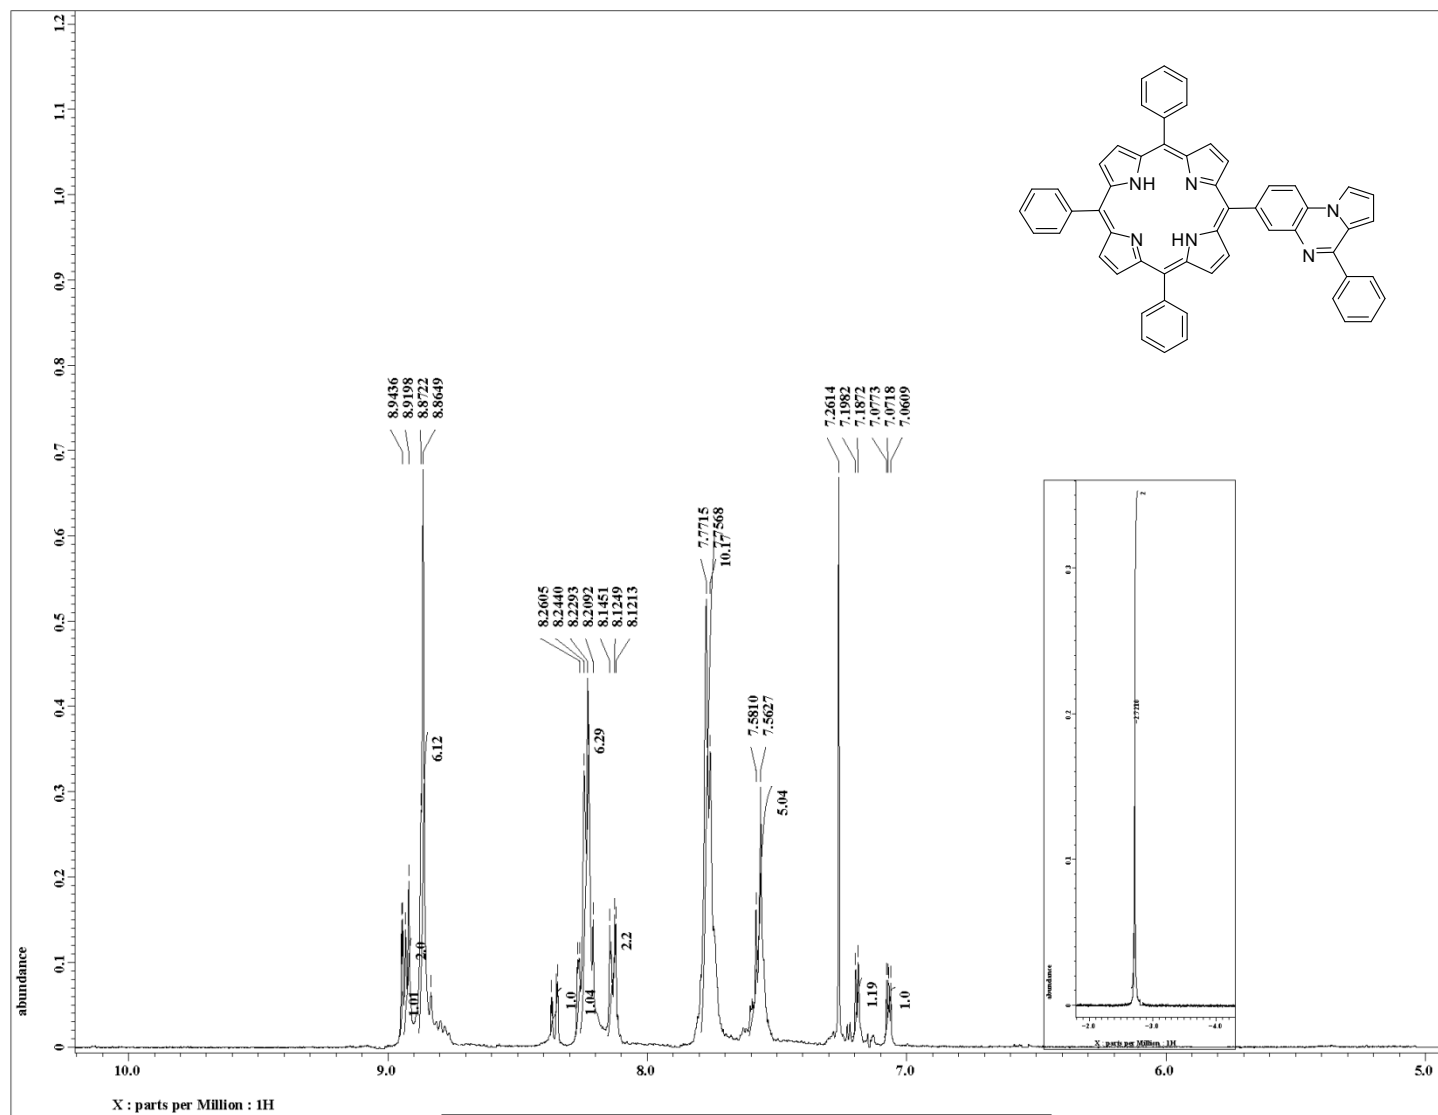

Figure 5:  $^1\text{H}$  NMR spectrum of compound 4a.

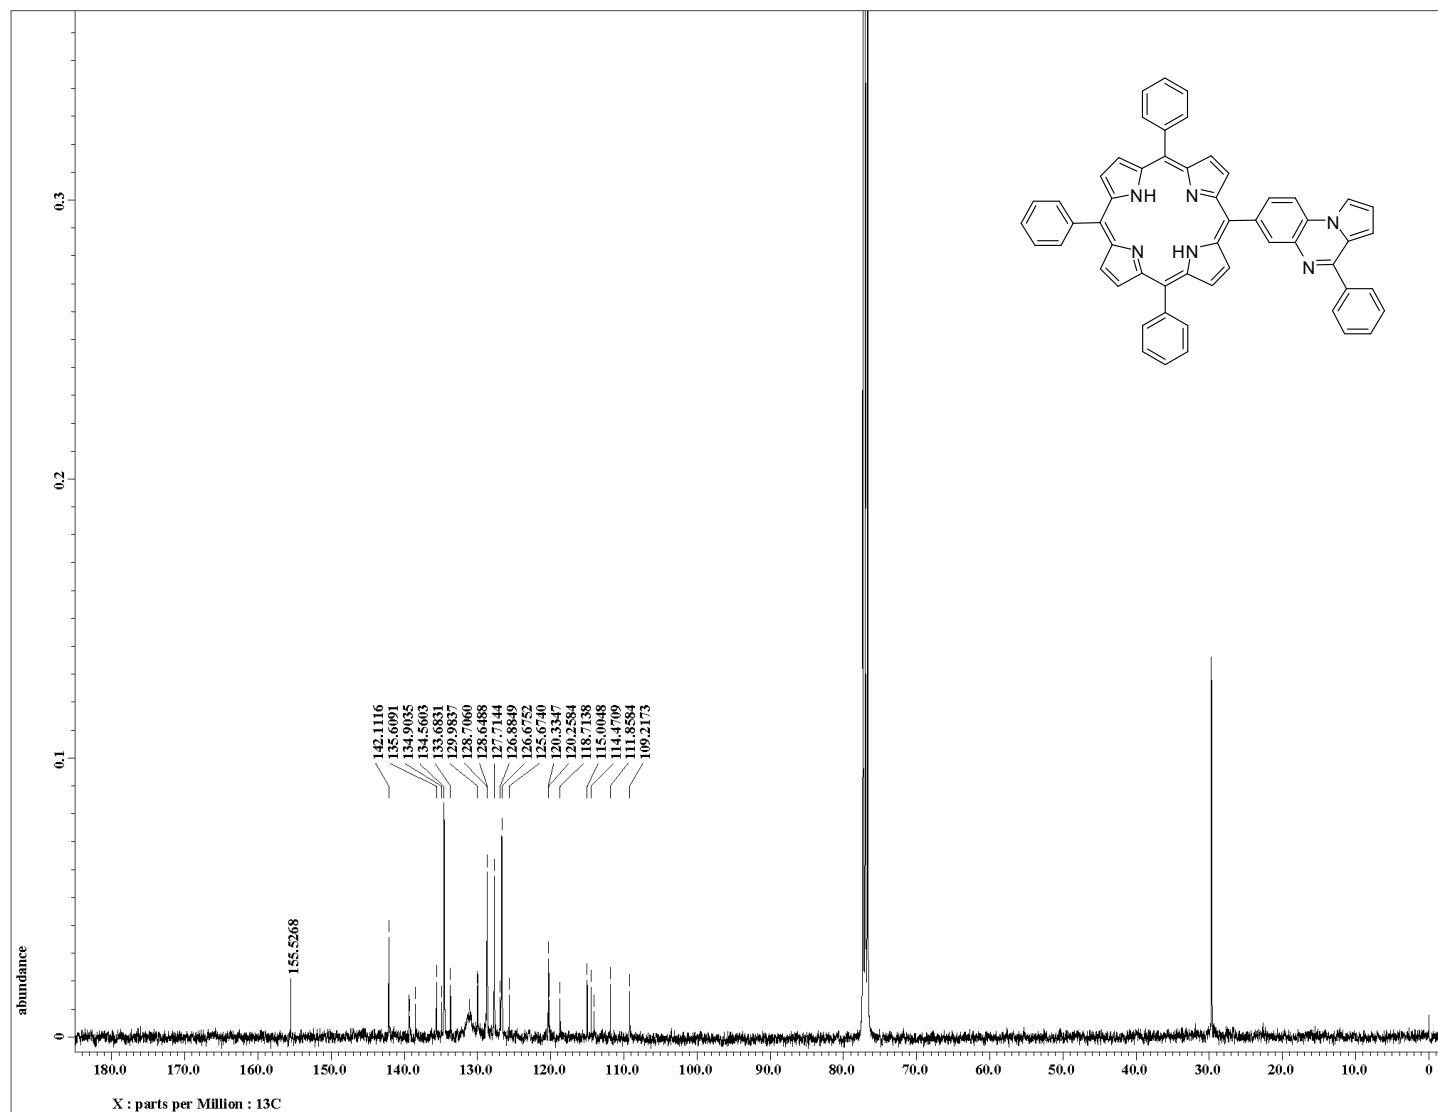

Figure 6:  $^{13}\text{C}$  NMR spectrum of compound 4a.

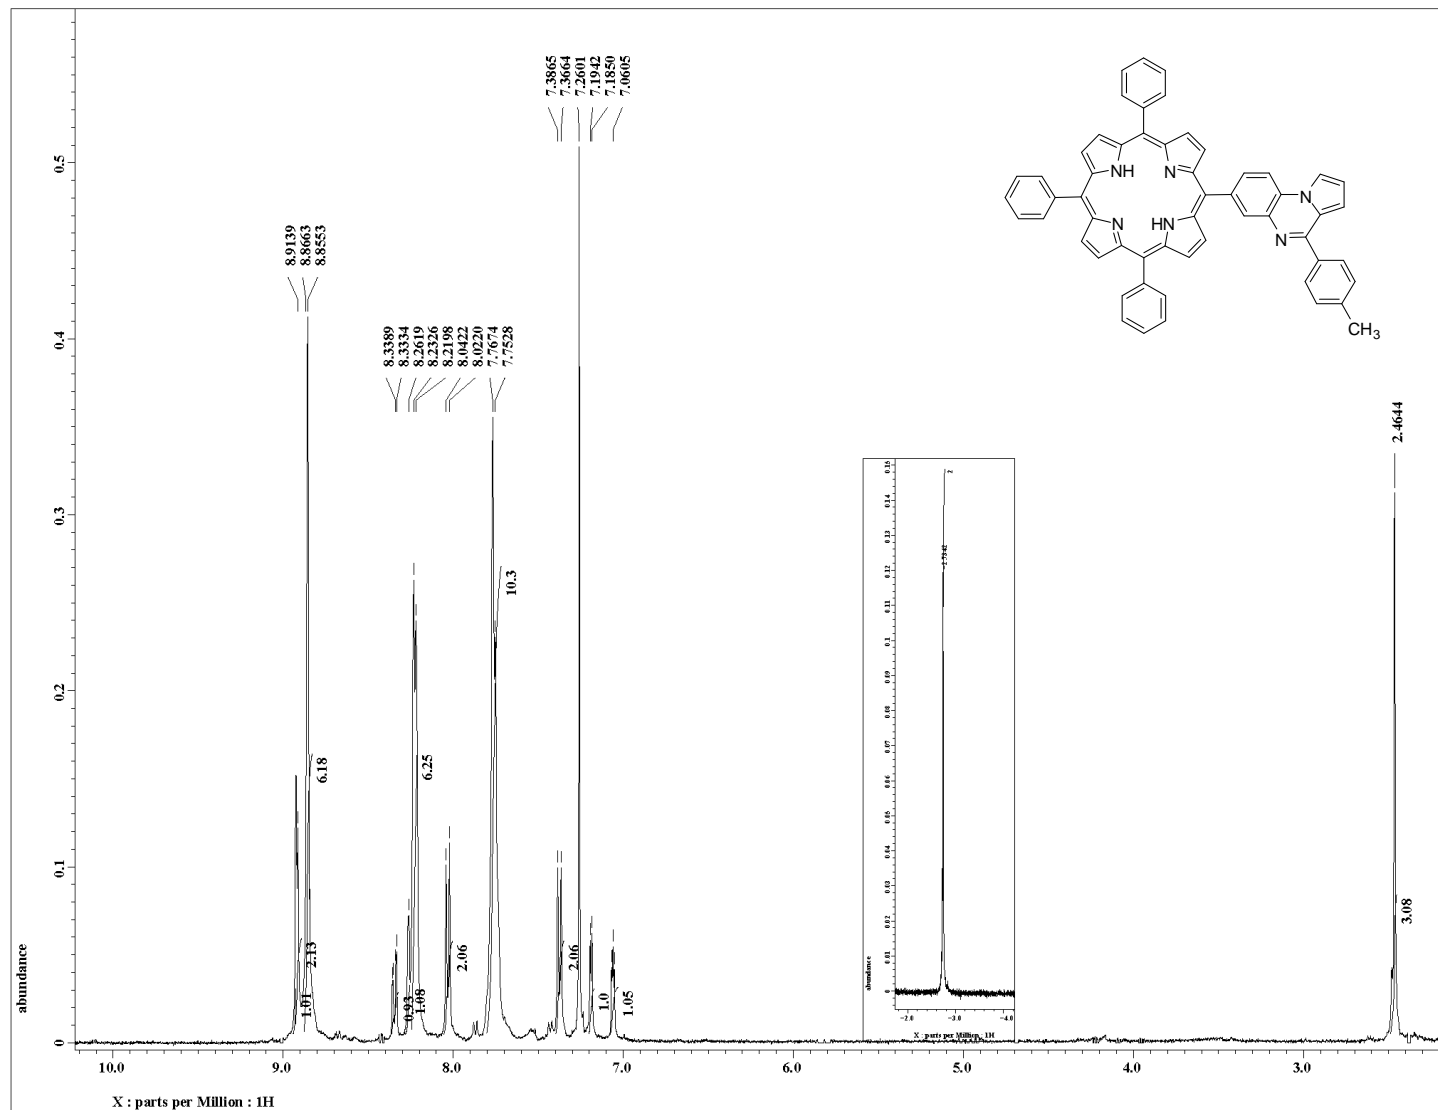

Figure 7: <sup>1</sup>H NMR spectrum of compound 4b.



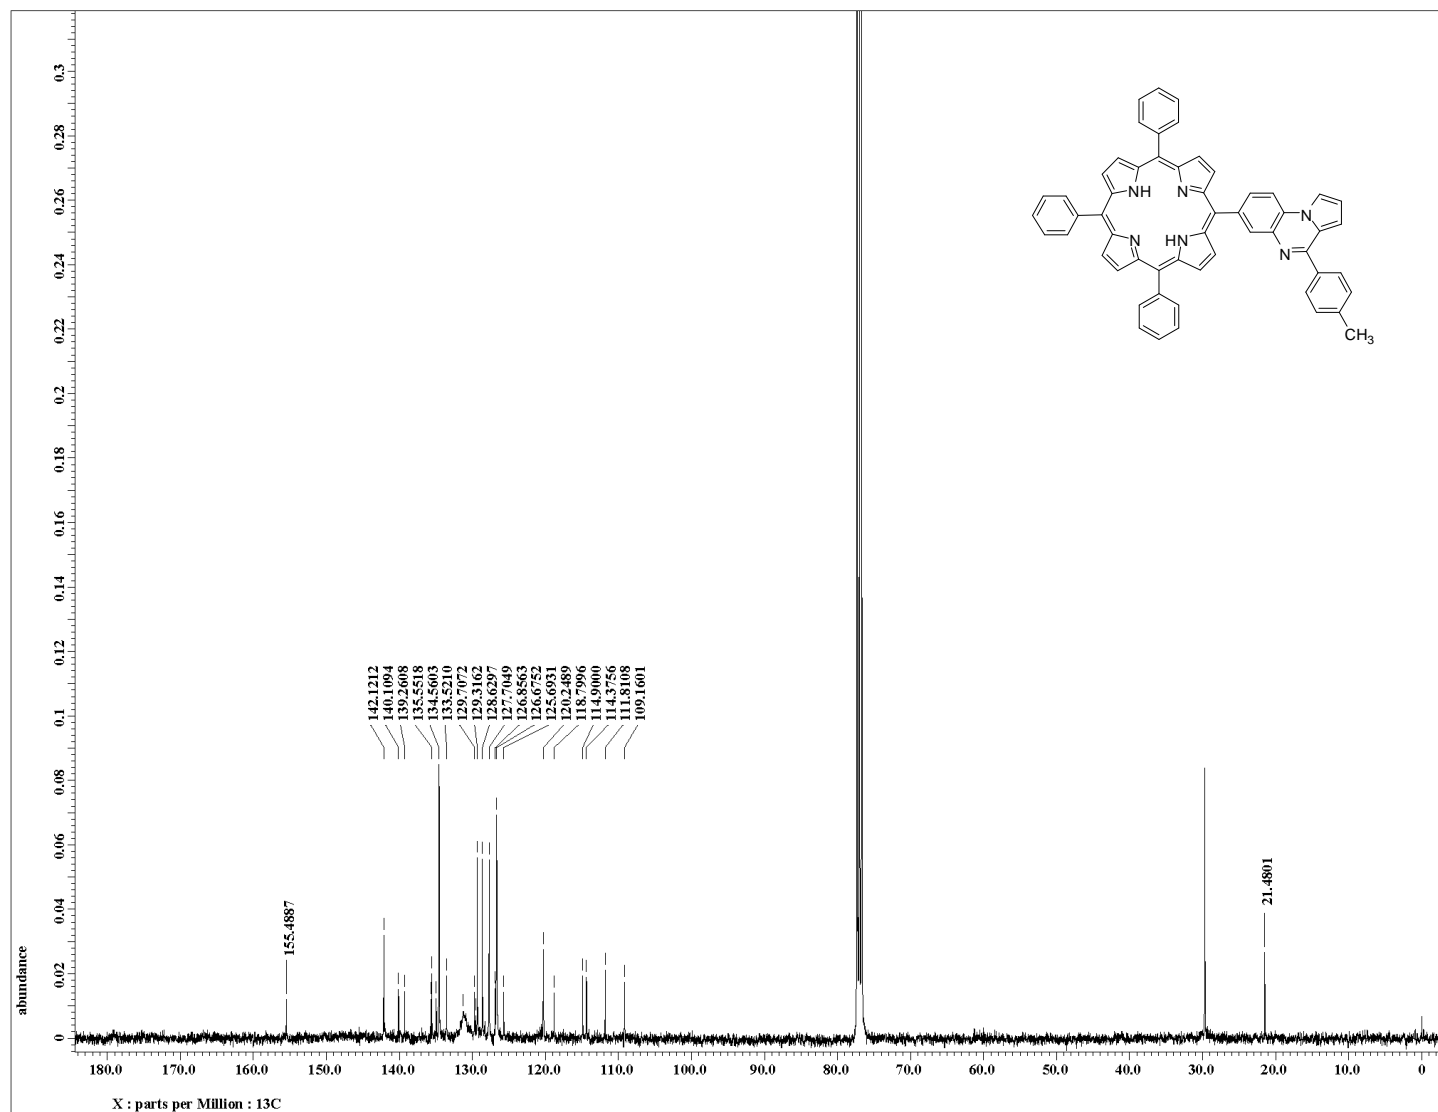

**Figure 8:**  $^{13}\text{C}$  NMR spectrum of compound **4b**.

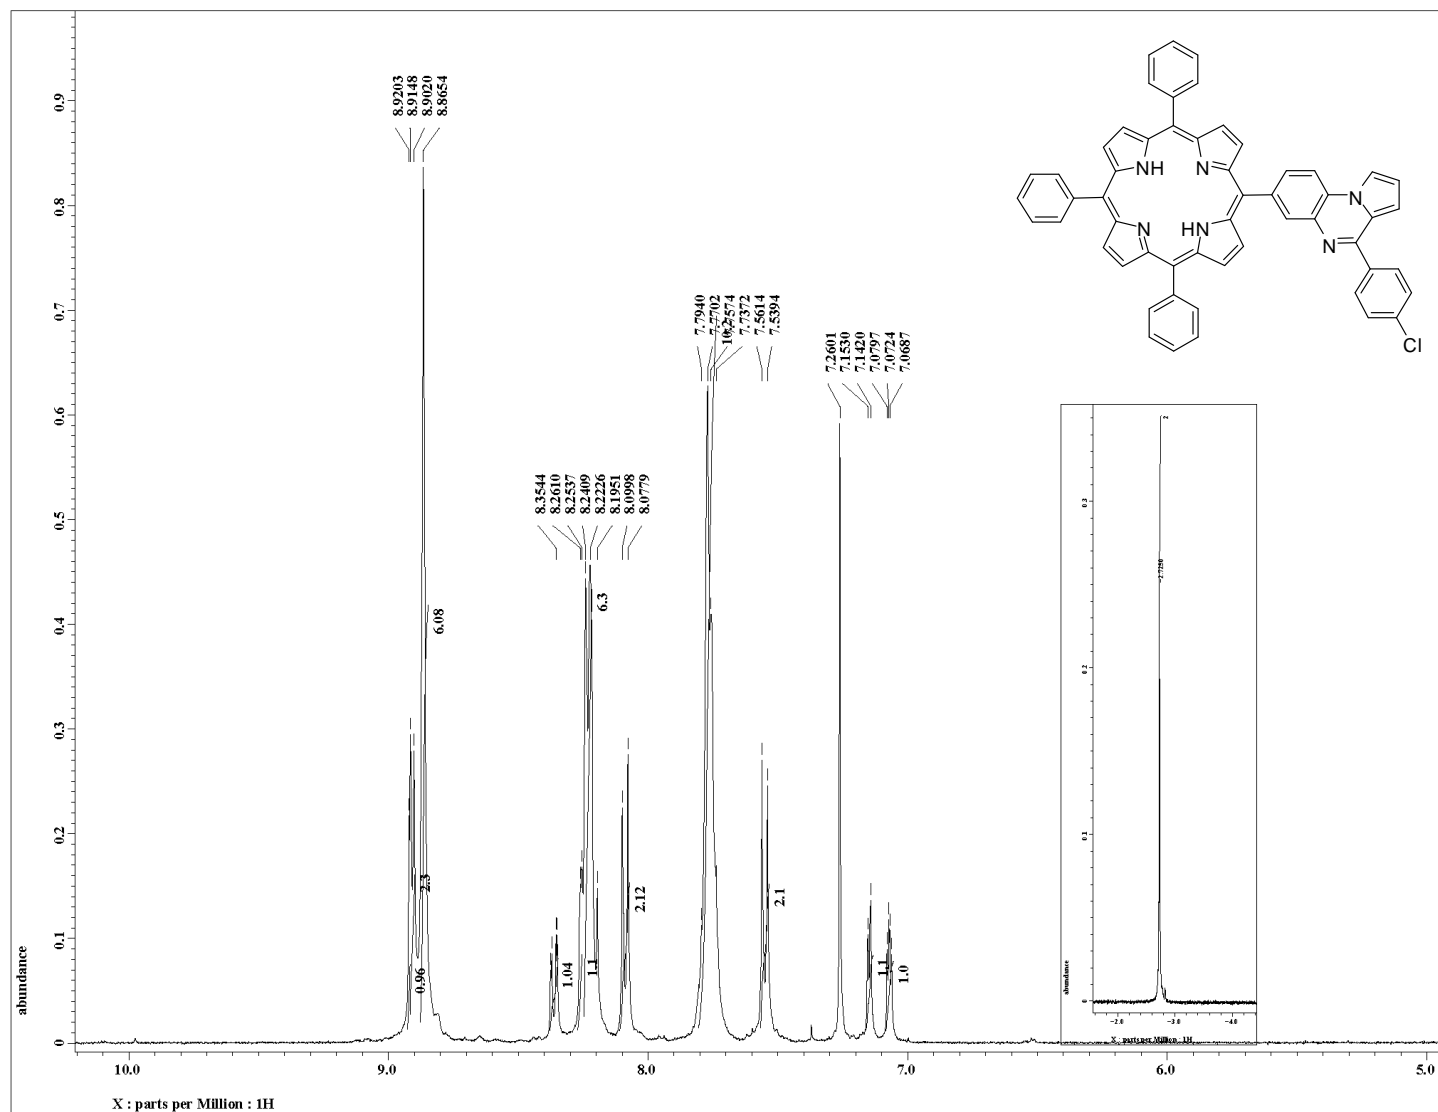

Figure 9:  $^1\text{H}$  NMR spectrum of compound 4c.

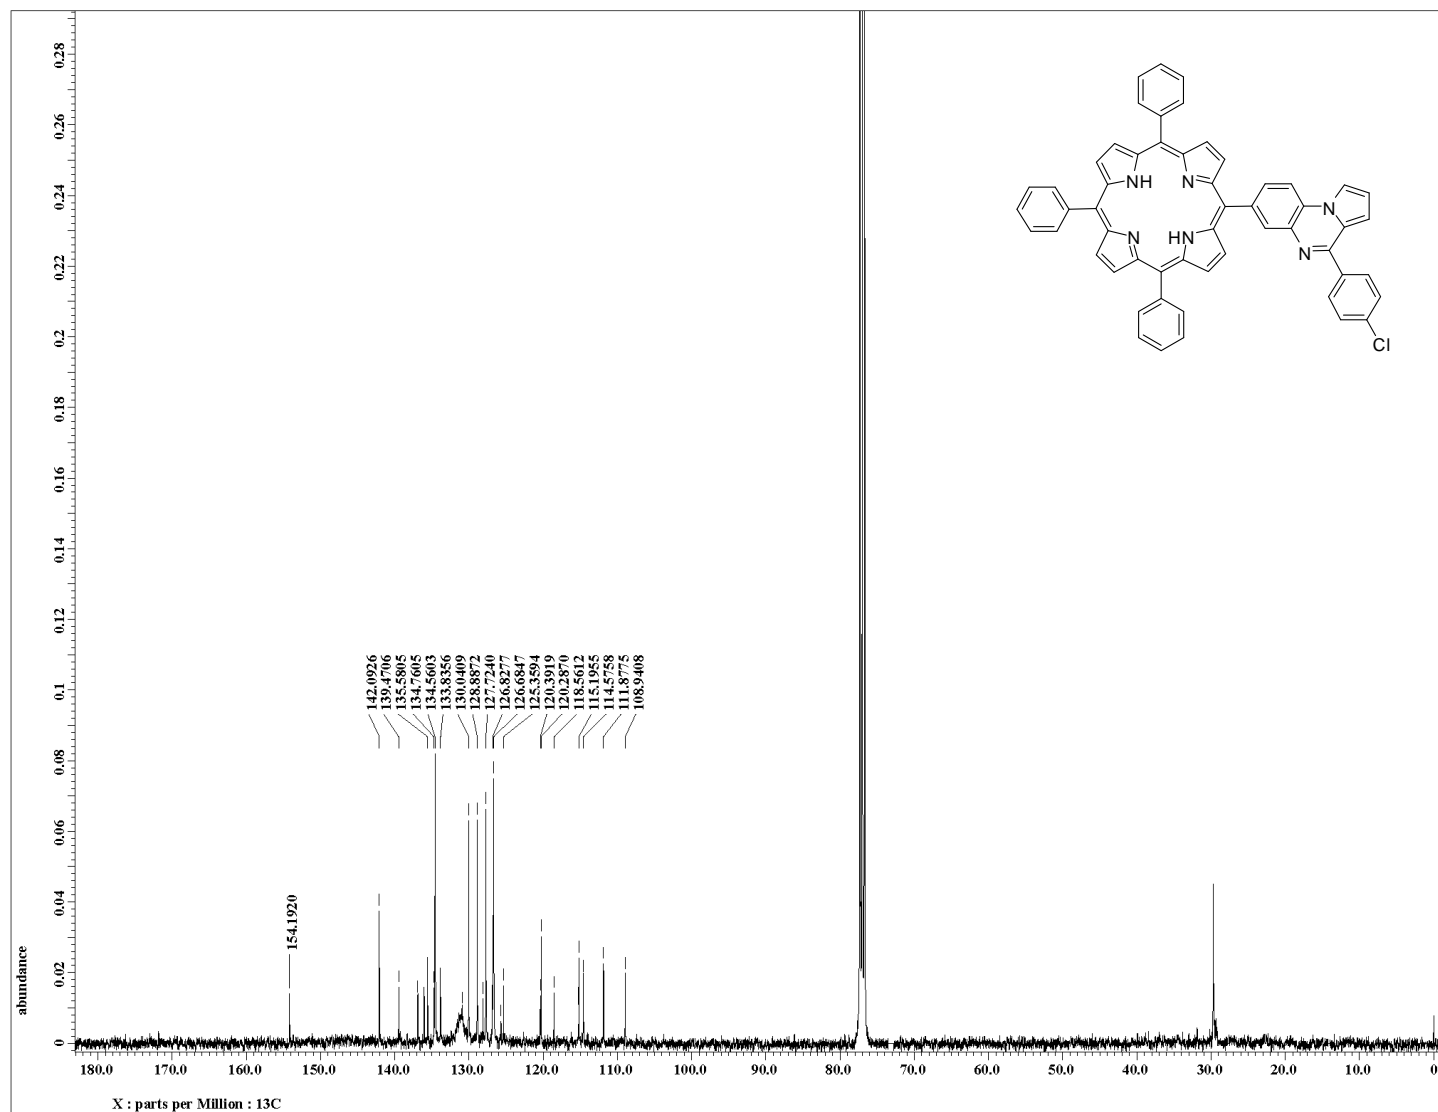

**Figure 10:**  $^{13}\text{C}$  NMR spectrum of compound 4c.



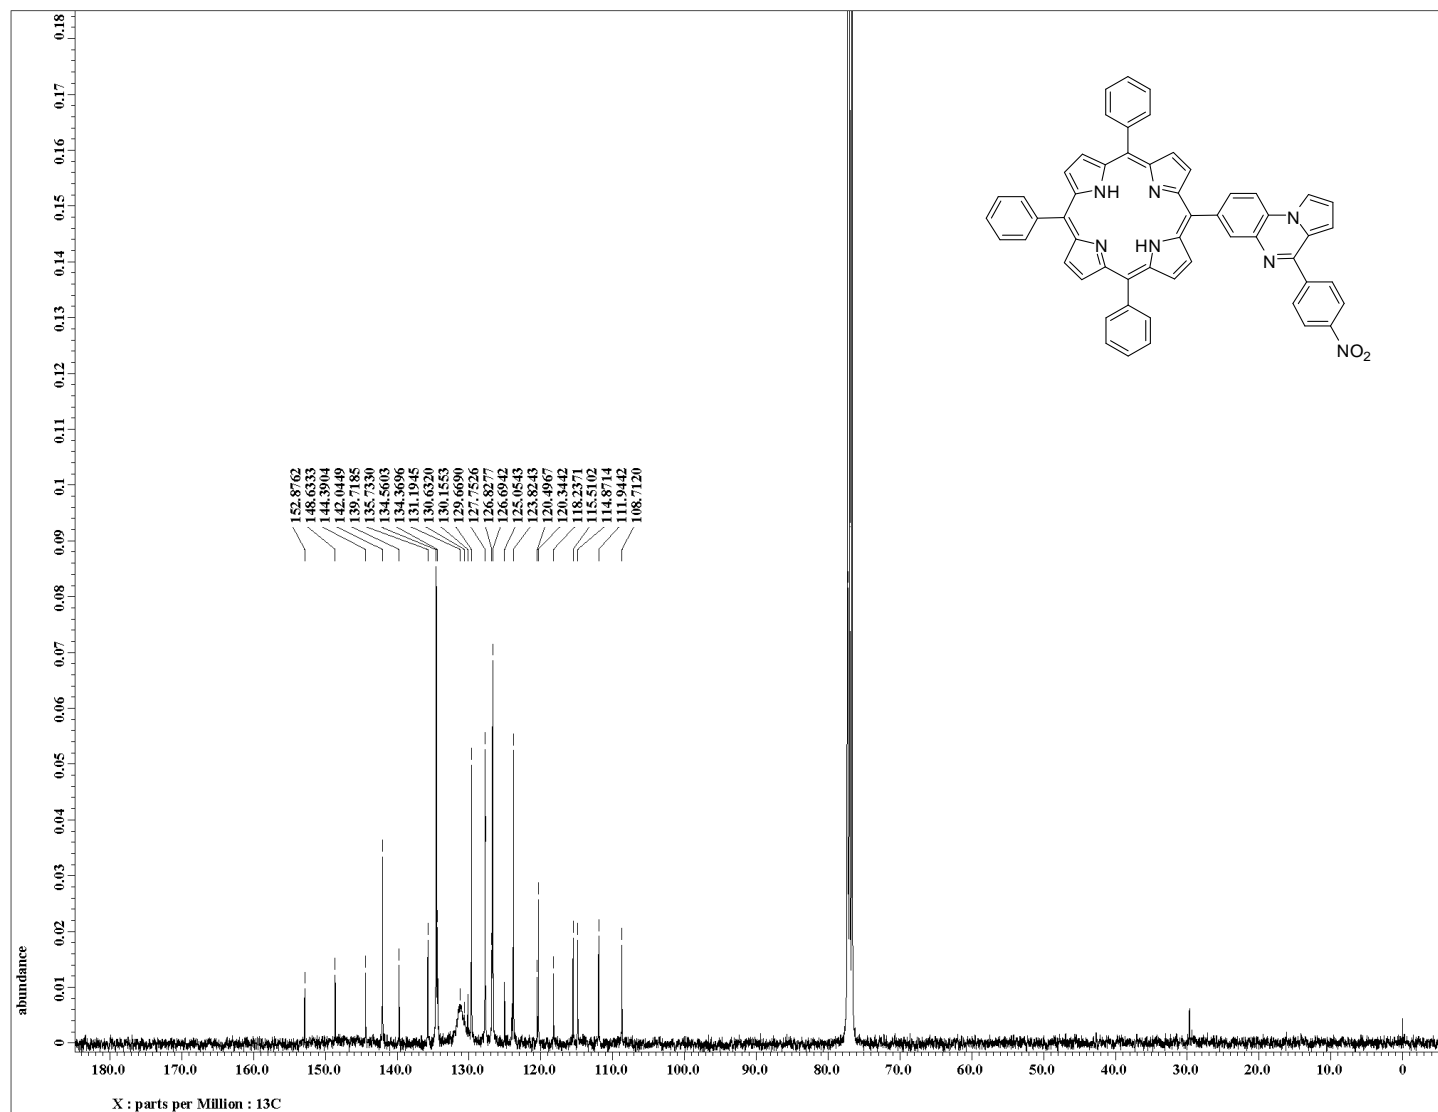

Figure 12:  $^{13}\text{C}$  NMR spectrum of compound **4d**.

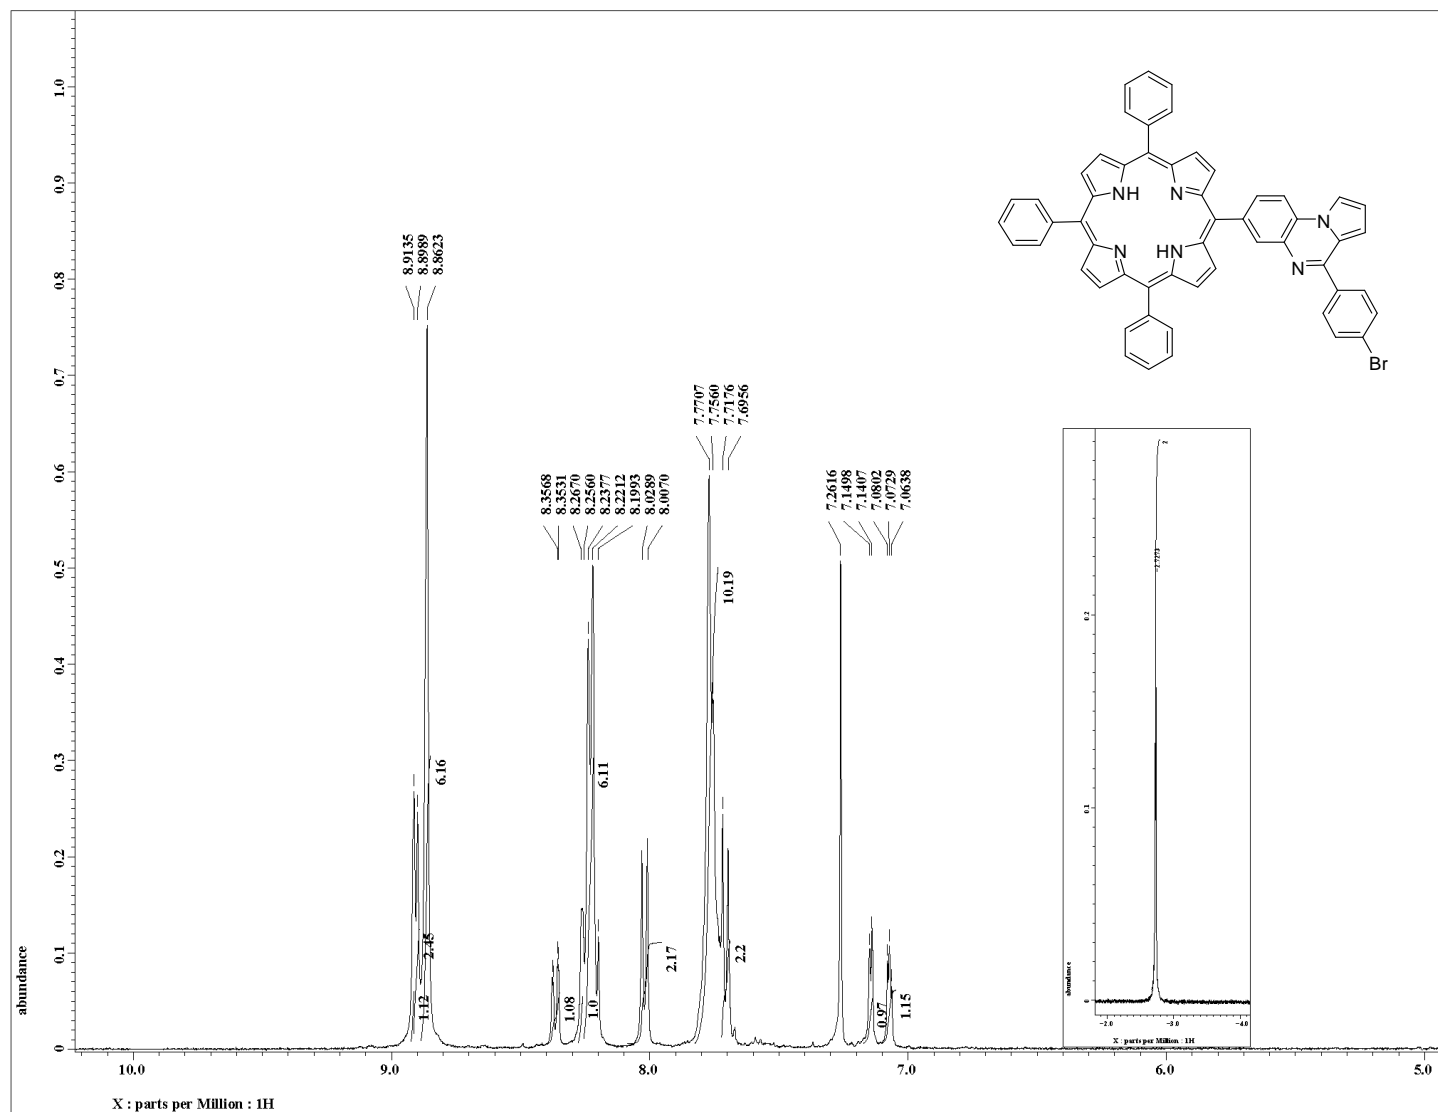

Figure 13: <sup>1</sup>H NMR spectrum of compound 4e.



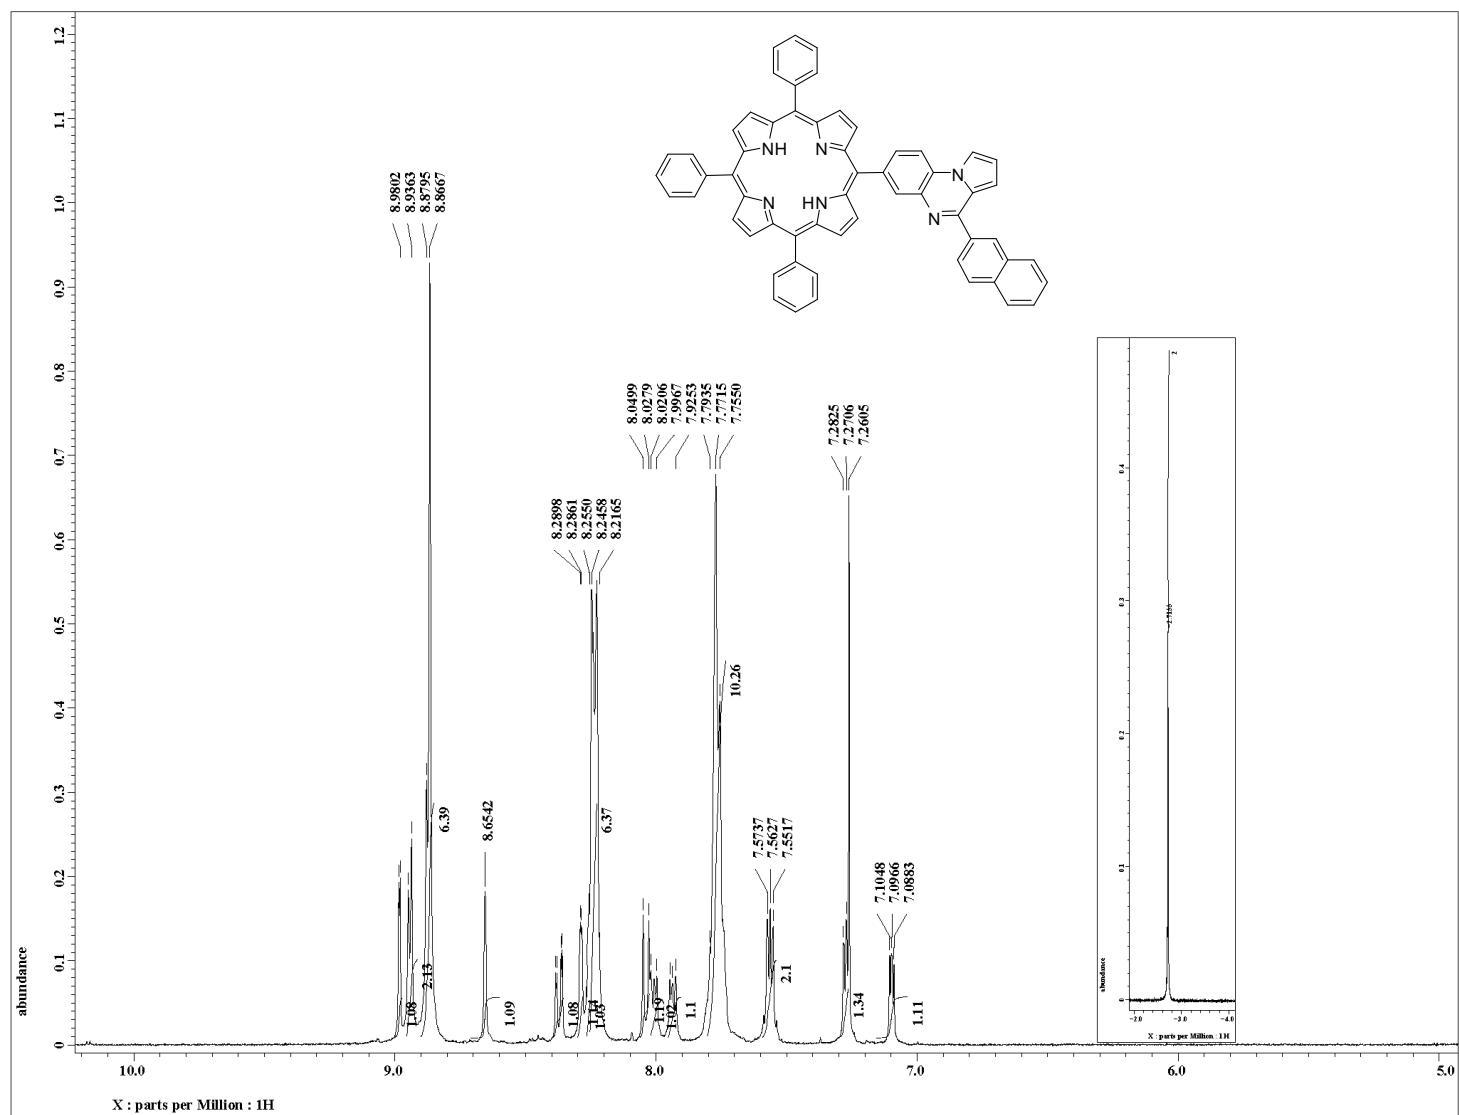

**Figure 15:**  $^1\text{H}$  NMR spectrum of compound **4f**.



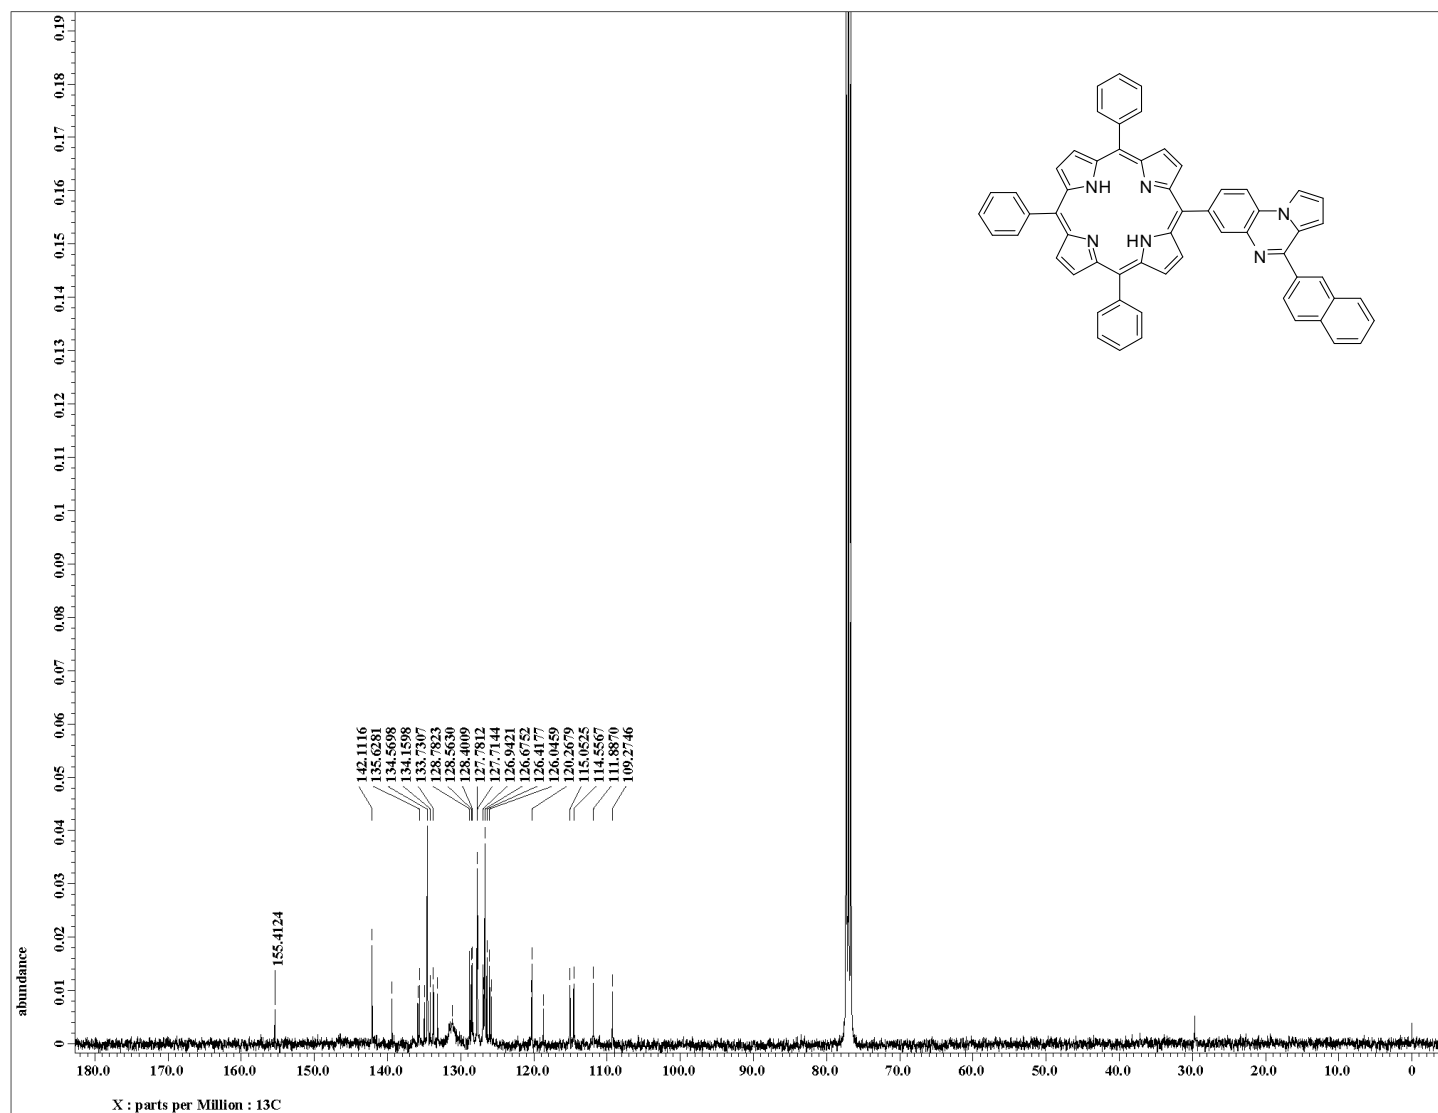

Figure 16:  $^{13}\text{C}$  NMR spectrum of compound 4f.

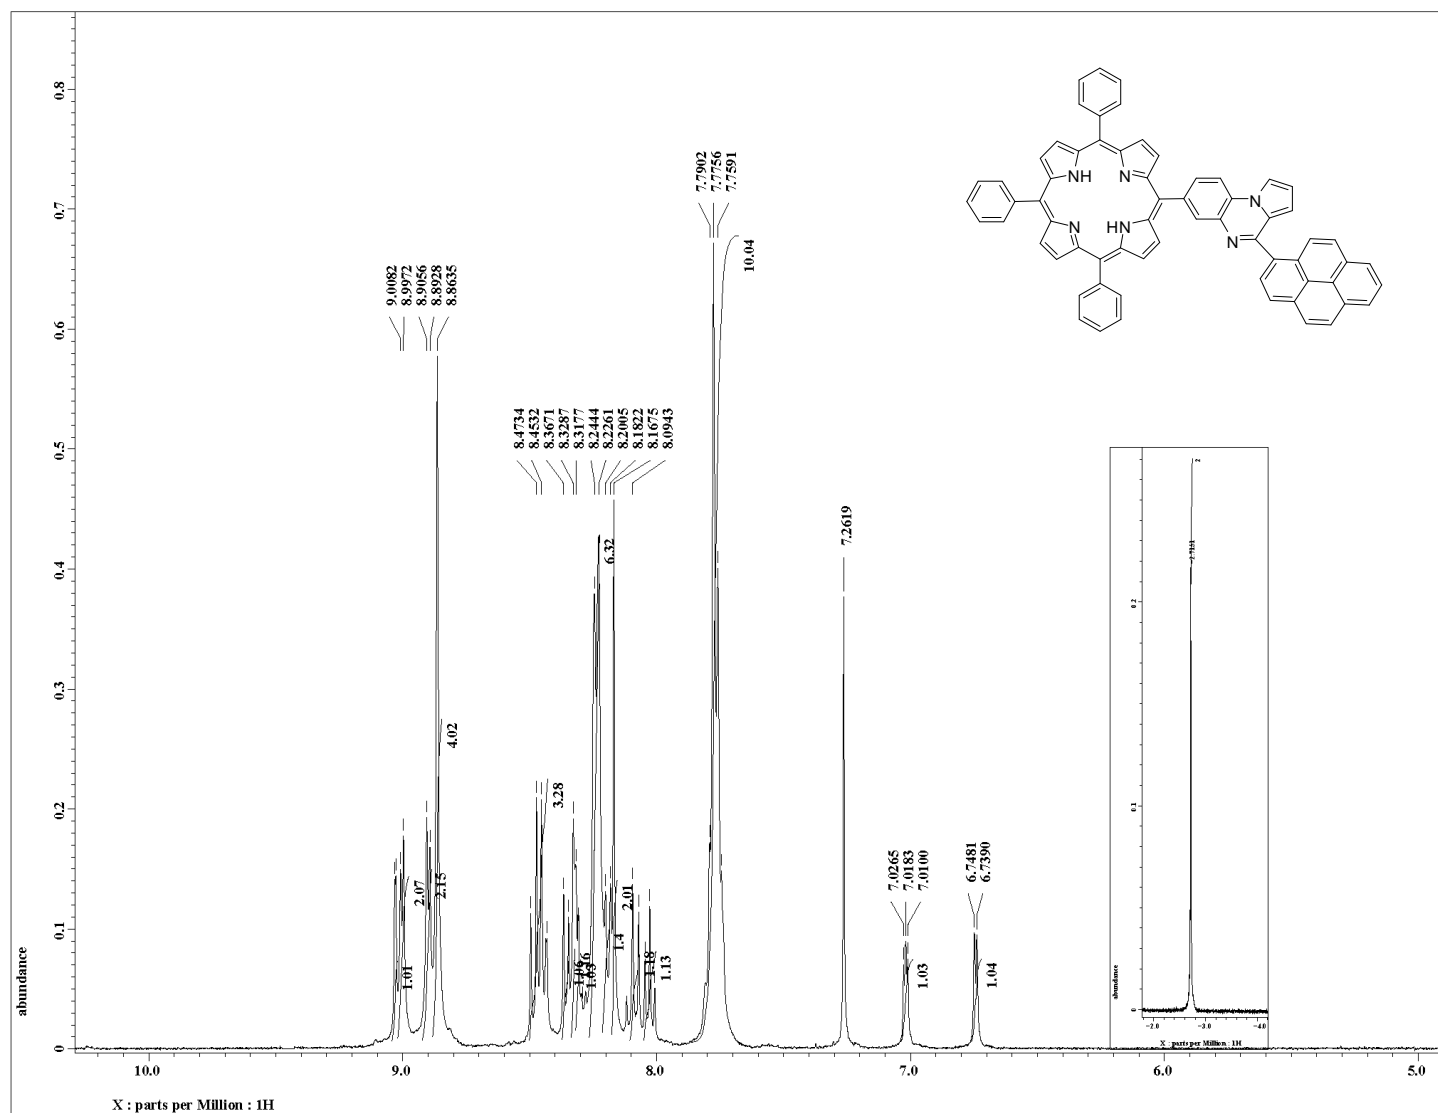

Figure 17: <sup>1</sup>H NMR spectrum of compound 4g.

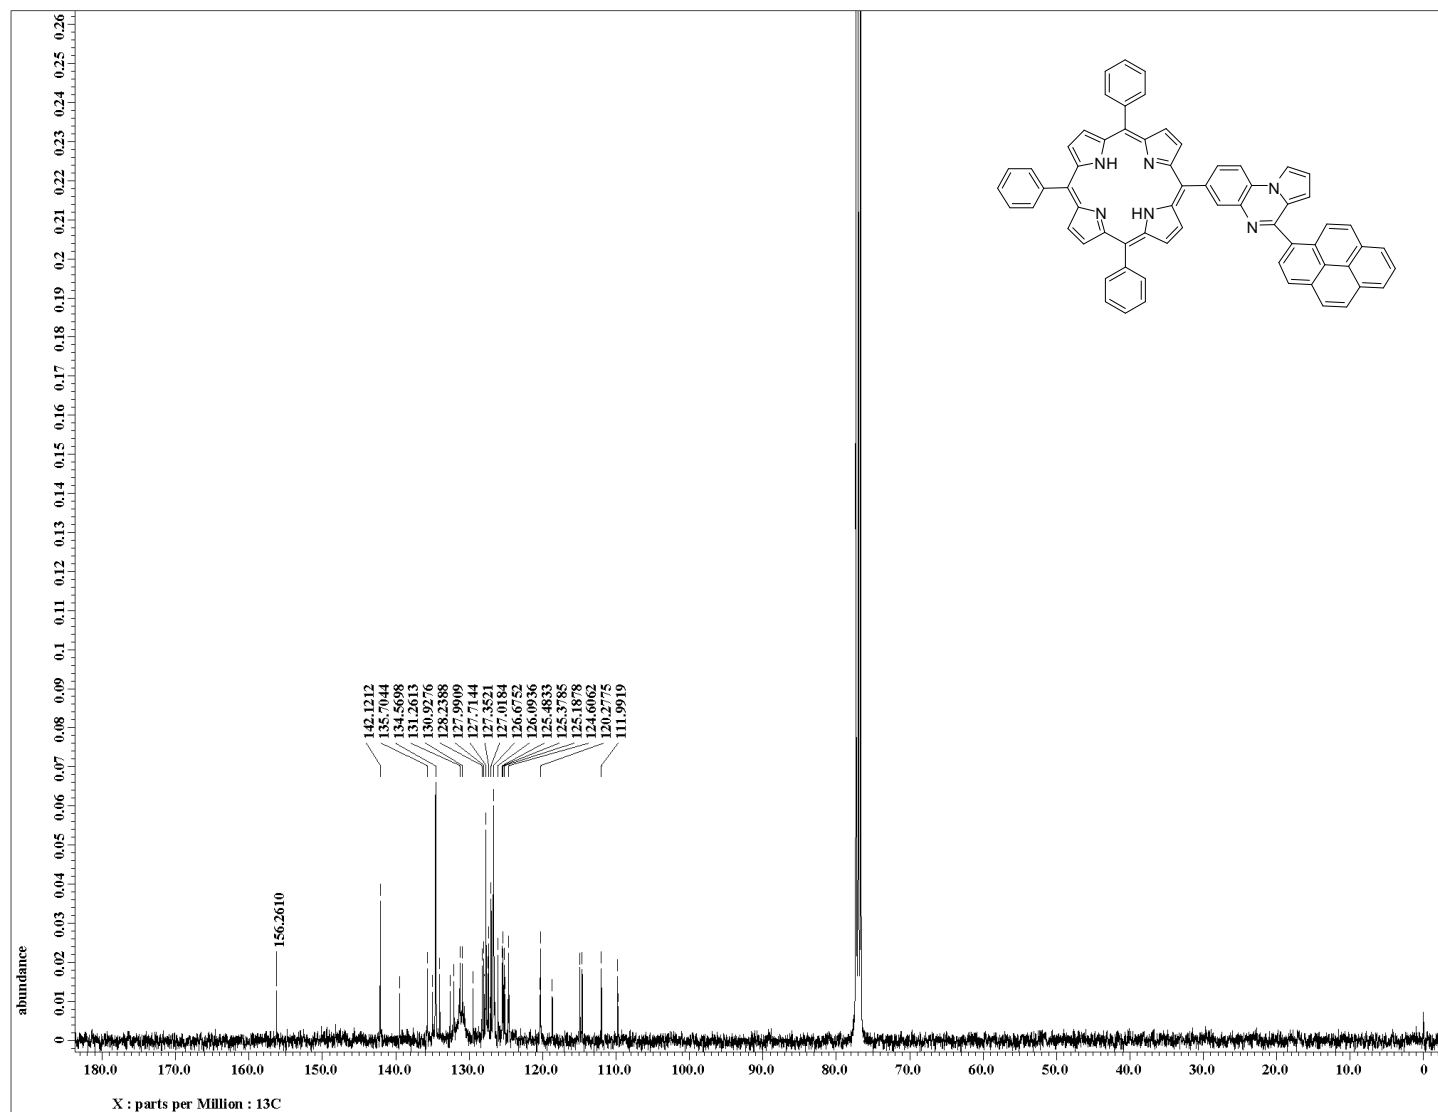

Figure 18:  $^{13}\text{C}$  NMR spectrum of compound **4g**.

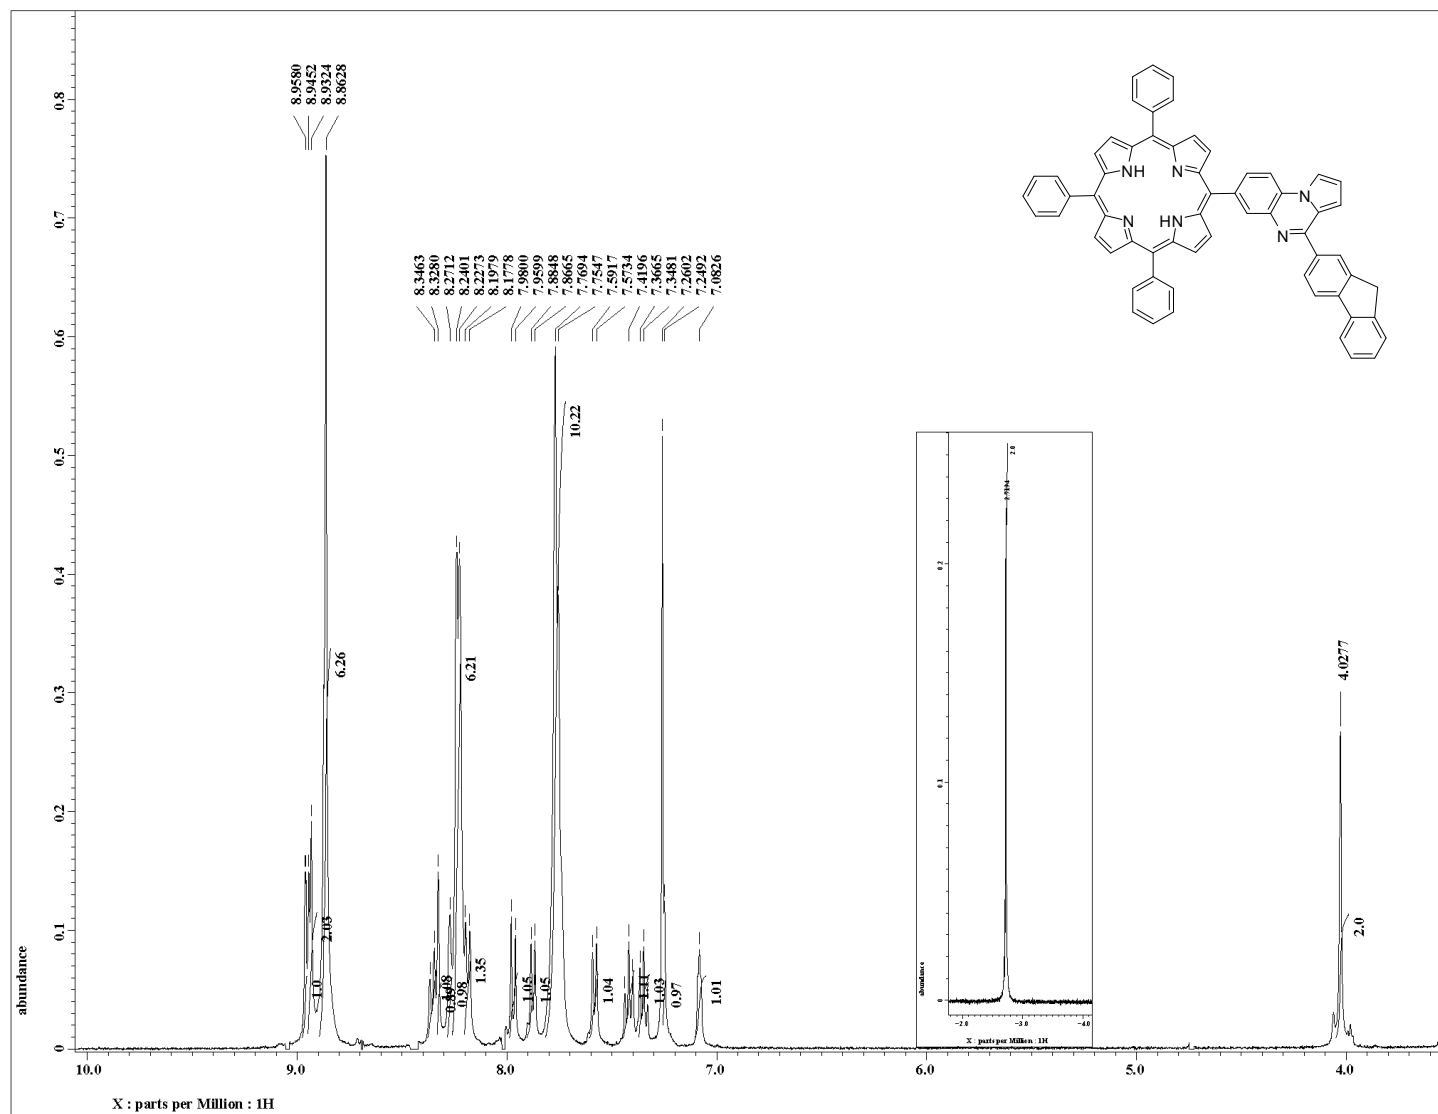

**Figure 19:**  $^1\text{H}$ NMR spectrum of compound 4h.

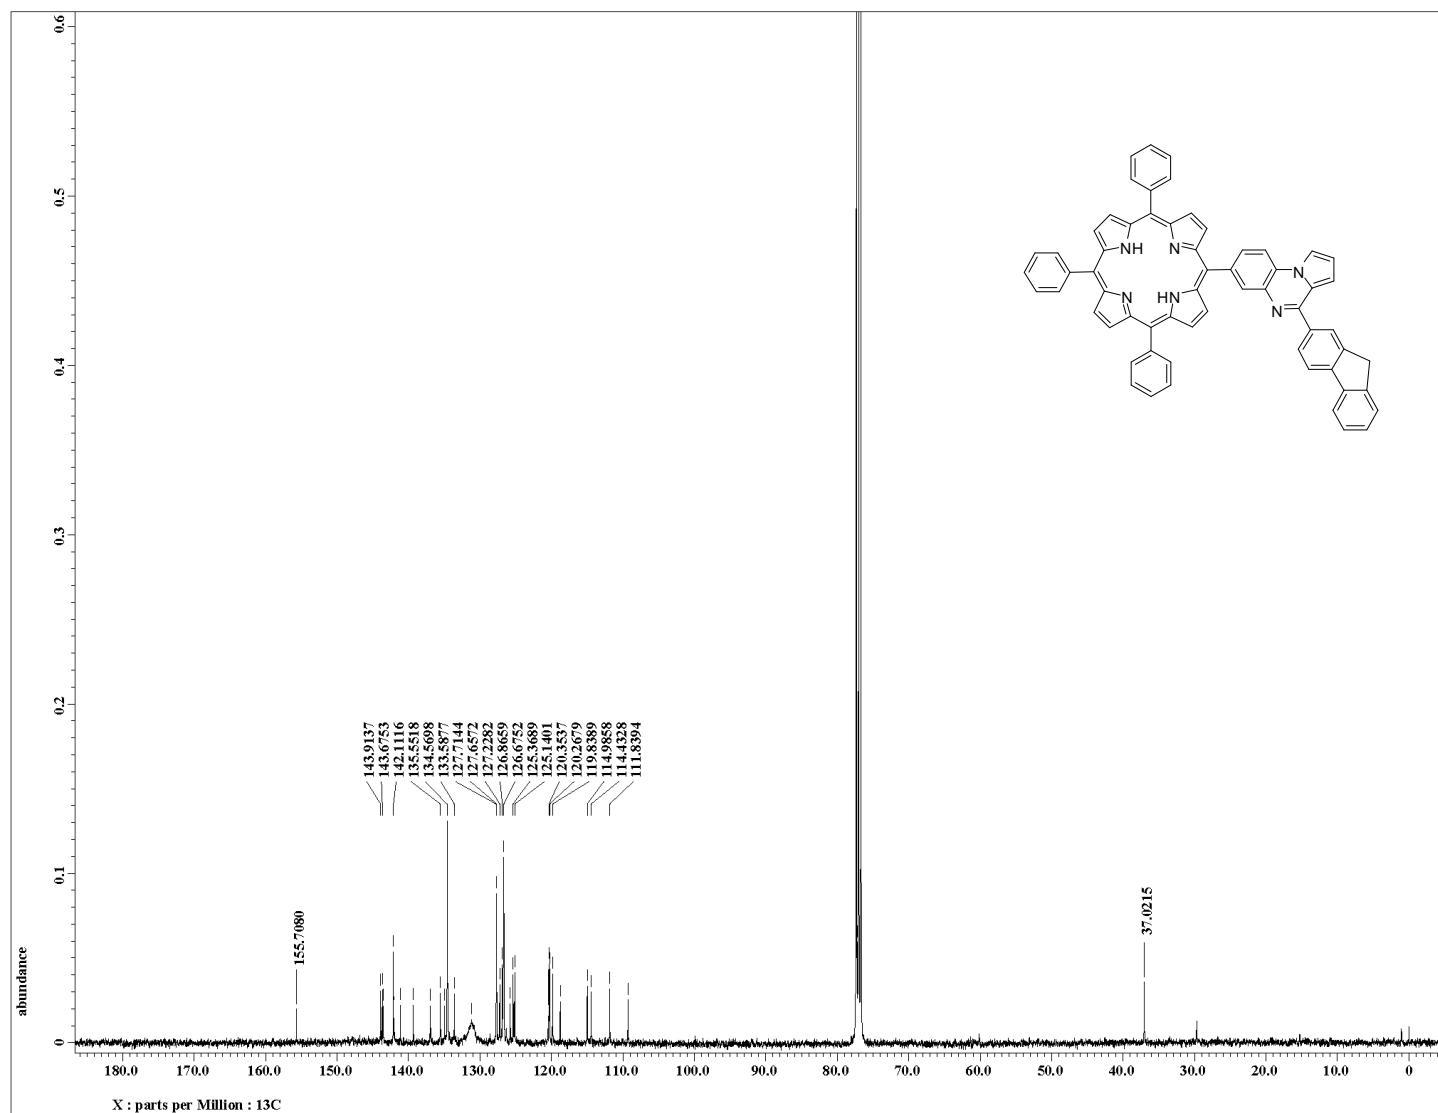

Figure 20:  $^{13}\text{C}$  NMR spectrum of compound 4h.

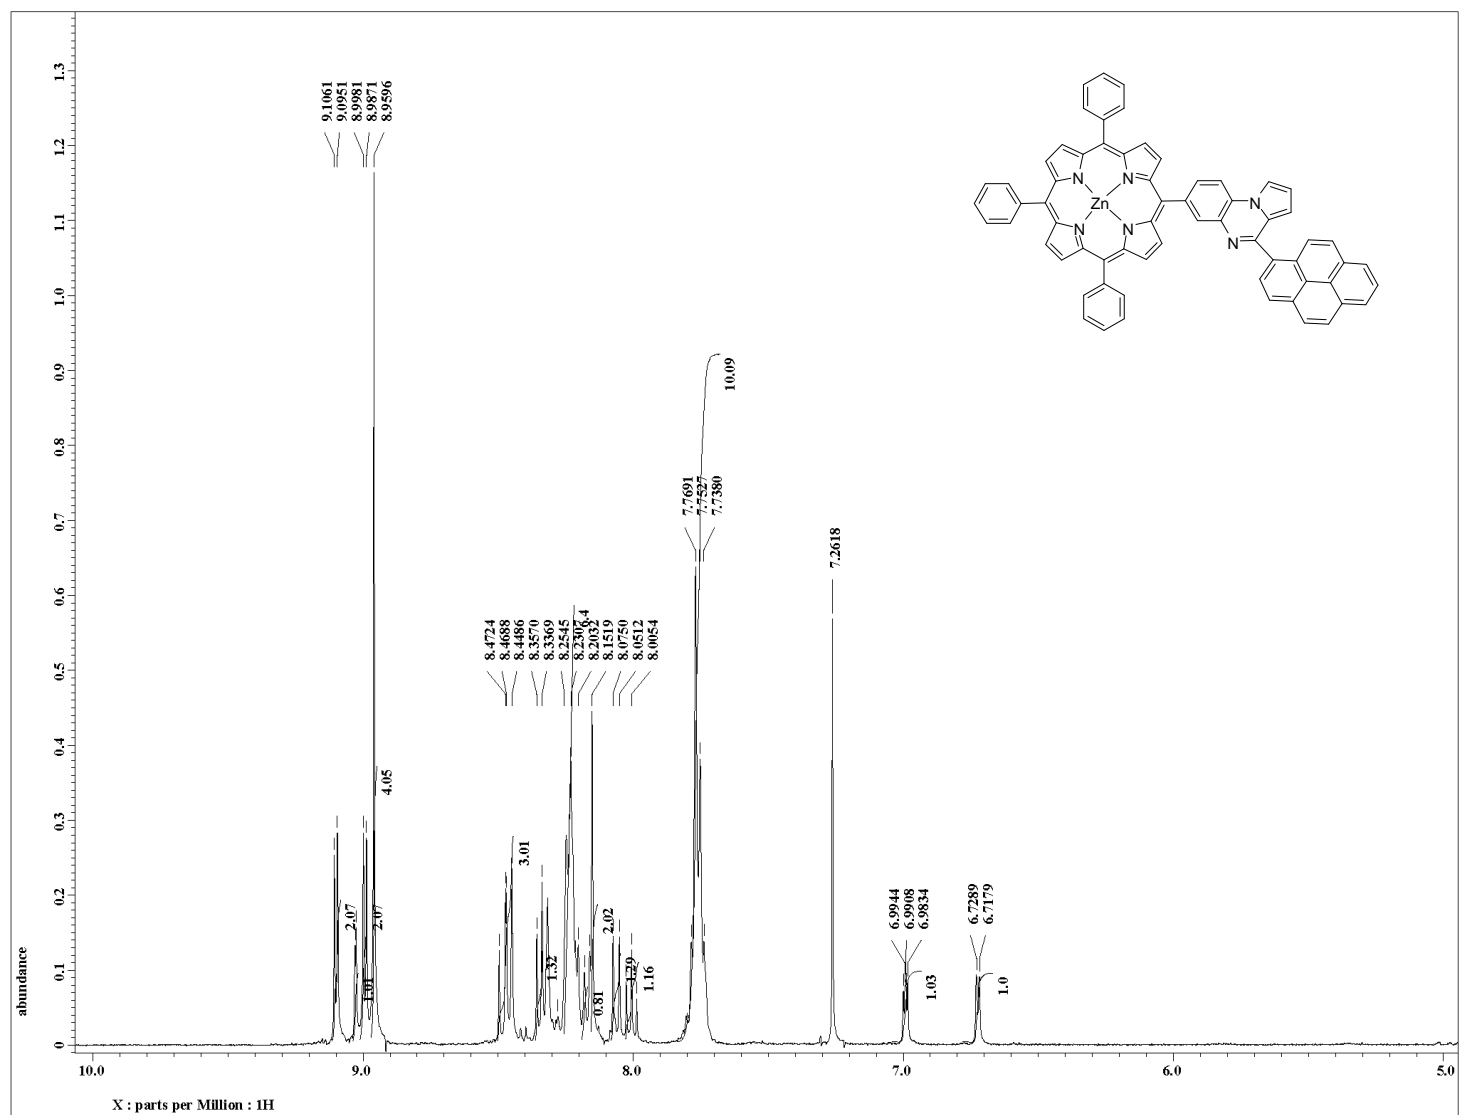

Figure 21: <sup>1</sup>H NMR spectrum of compound 5.

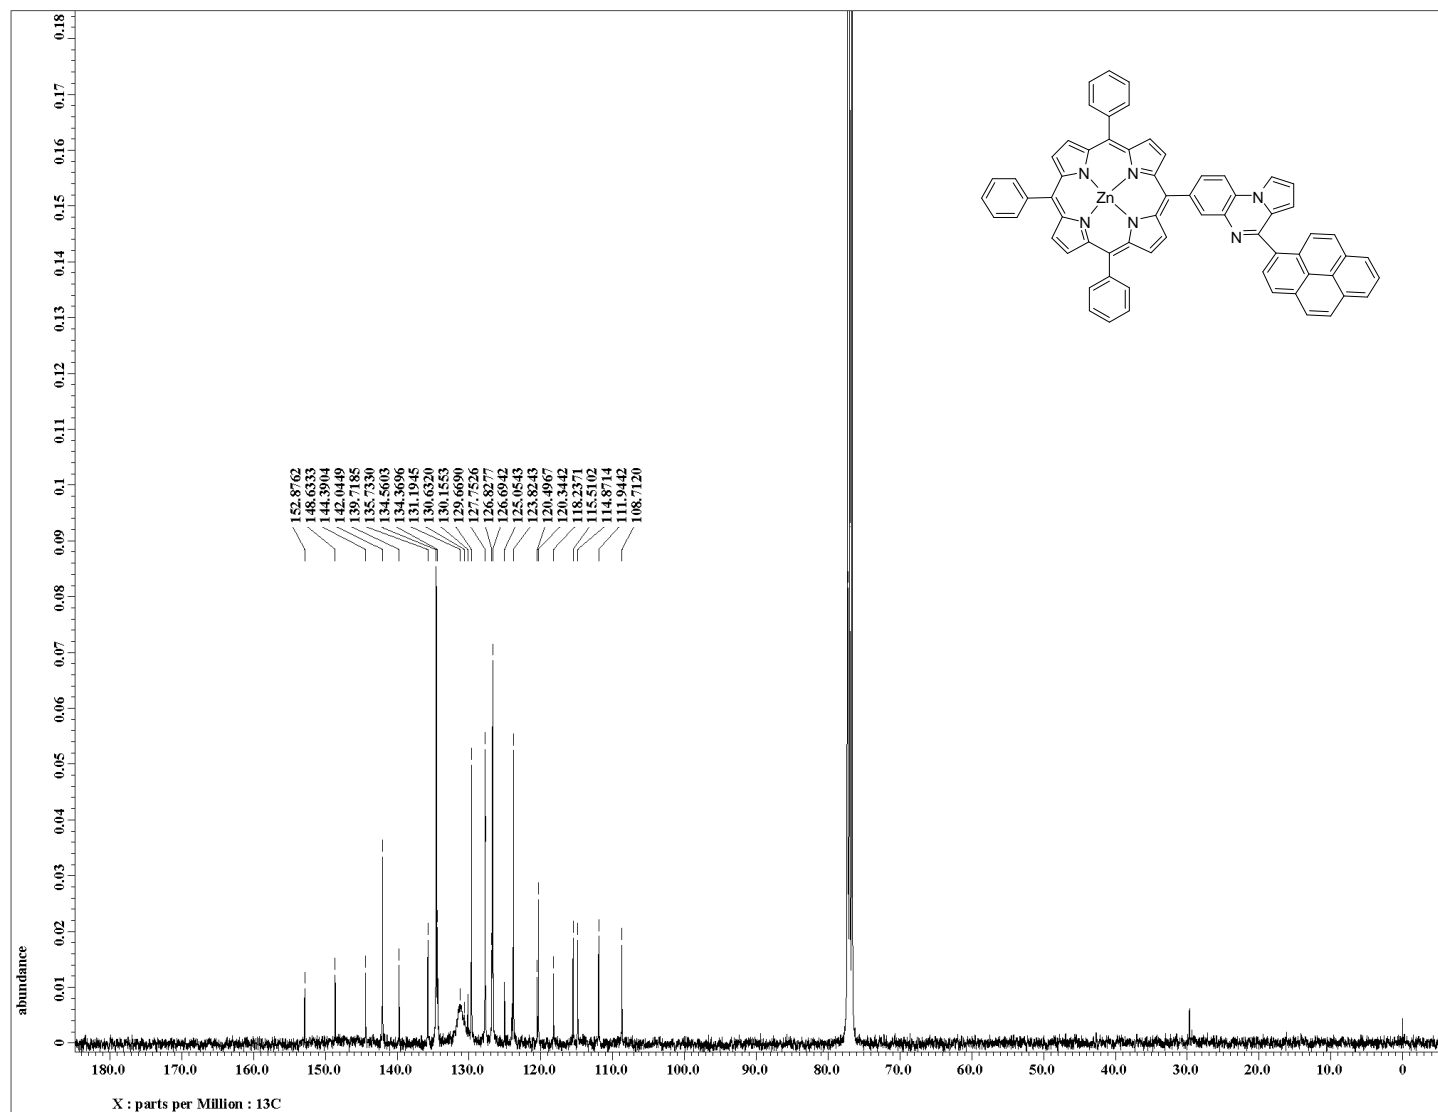

Figure 22:  $^{13}\text{C}$  NMR spectrum of compound 5.

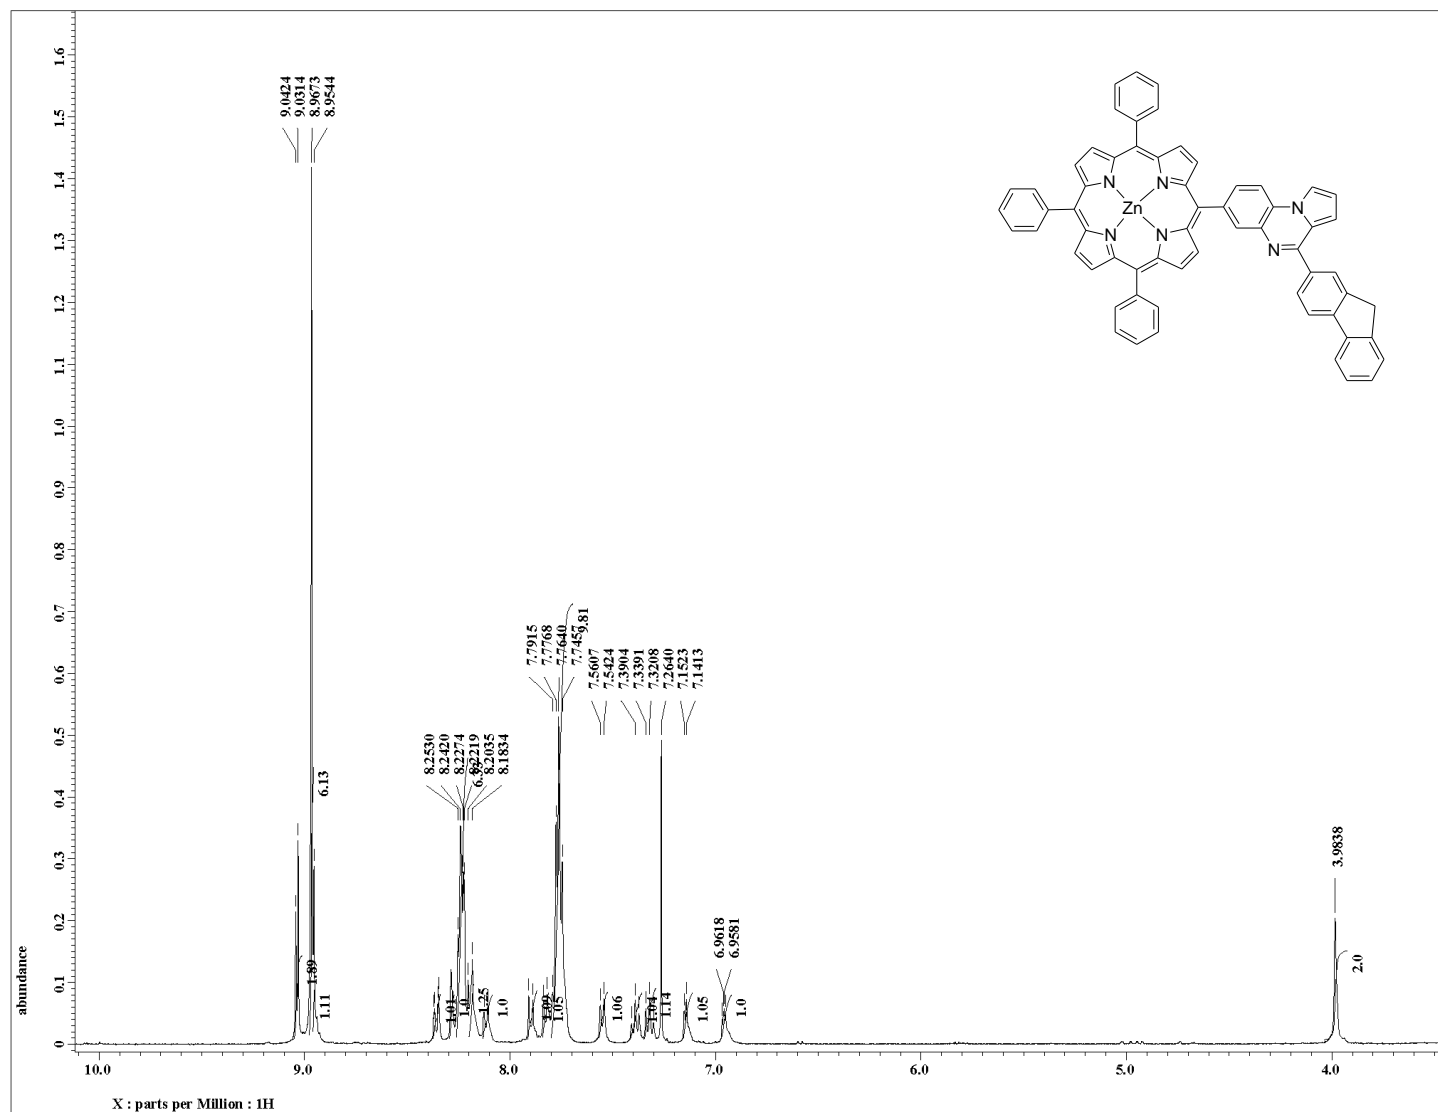

Figure 23: <sup>1</sup>H NMR spectrum of compound 6.
